# Supplementary material
Source: PubMed Central journal article supplement (PMC3285320)
Supplement: supp_M111.301366_jbc.M111.301366-1.pdf [file supp_M111.301366_jbc.M111.301366-1.pdf]

**Table S1: Genes upregulated with Quis treatment**

| <i>Affymetrix Probeset</i> | <i>Accession Number</i> | <i>Unigene Gene Name</i>                                       | <i>Fold Change</i> | <i>95% CI</i> |
|----------------------------|-------------------------|----------------------------------------------------------------|--------------------|---------------|
| 1387316_at                 | NM_030845               | Chemokine (C-X-C motif) ligand 1; Cxcl1                        | 13.0               | 7.3 to 18.7   |
| 1369191_at                 | NM_012589               | Interleukin 6; Il6                                             | 11.7               | 4.2 to 17.2   |
| 1389402_at                 | AI178746                | Csrnp1; AXUD1                                                  | 4.6                | 1.7 to 7.7    |
| 1382351_at                 | AI069972                | Ras-related GTPase; Kir/Gem                                    | 4.4                | 1.0 to 8.2    |
| 1378032_at                 | AI176265                | NFkappaBz; IkBz                                                | 4.0                | 0.1 to 8.2    |
| *1398266_a_at              | D83508                  | Early growth response 2; egr2                                  | 3.9                | 3.1 to 4.6    |
| 1393728_at                 | AA964541                | Leukemia inhibitory factor; Lif                                | 3.6                | 1.1 to 6.3    |
| *1386995_at                | BI288701                | B-cell translocation gene 2; Btg2                              | 3.5                | 0.4 to 7.0    |
| *1387306_a_at              | NM_053633               | Early growth response 2; egr2                                  | 3.4                | 2.3 to 4.4    |
| 1387260_at                 | NM_053713               | Kruppel-like factor 4; KLF4                                    | 3.3                | 1.7 to 5.0    |
| *1387410_at                | U72345                  | Nuclear receptor subfamily 4, group A, member 2; Nr4a2; Nurr1  | 3.1                | 2.3 to 3.9    |
| 1387068_at                 | NM_019361               | Activity regulated cytoskeletal-associated protein; Arc        | 2.9                | 2.5 to 3.4    |
| 1372389_at                 | BF420059                | immediate early response 2; Ier2                               | 2.9                | 1.4 to 4.5    |
| *1386994_at                | NM_017259               | B-cell translocation gene 2; Btg2                              | 2.8                | 1.8 to 3.8    |
| *1369007_at                | L08595                  | Nuclear receptor subfamily 4, group A, member 2; Nr4a2         | 2.8                | 2.4 to 3.2    |
| 1394451_at                 | AI236455                | Annexin A1                                                     | 2.7                | 1.3 to 4.1    |
| 1380229_at                 | AW530004                | v-maf musculoaponeurotic fibrosarcoma oncogene homolog F; Maff | 2.6                | 1.6 to 3.5    |
| *1368147_at                | BE110108                | Dual specificity phosphatase 1; Dusp1                          | 2.5                | 0.8 to 4.2    |
| 1373866_at                 | AI228596                | Coq10b                                                         | 2.4                | 1.2 to 3.8    |
| 1369217_at                 | NM_017352               | Nuclear receptor subfamily 4, group A, member 3; Nr4a3; Nor1   | 2.4                | 1.2 to 3.6    |
| 1369268_at                 | NM_012912               | Activating transcription factor 3; Atf3                        | 2.4                | 1.5 to 3.3    |
| 1386935_at                 | NM_024388               | Nuclear receptor subfamily 4, group A, member 1; Nr4a1; Nur77  | 2.4                | 1.7 to 3.1    |
| 1394925_at                 | AI578037                | Similar to RIKEN cDNA 2310035C23                               | 2.3                | -0.2 to 5.2   |
| *1368146_at                | U02553                  | Dual specificity phosphatase 1; Dusp1                          | 2.3                | 2.0 to 2.5    |
| 1368124_at                 | NM_133578               | Dual specificity phosphatase 5; Dusp5                          | 2.2                | 0.2 to 4.3    |
| 1368596_at                 | NM_021693               | SNF1-like kinase; SIK1                                         | 2.2                | 1.4 to 3.0    |
| 1368050_at                 | NM_053662               | Cyclin L1; Ccnl1; Ania-6                                       | 2.1                | 0.4 to 4.0    |
| *1371019_at                | BM387324                | Tribbles homolog 1; Trib1                                      | 2.1                | 1.4 to 2.9    |
| *1391643_at                | BI290758                | Tribbles-1; Trib1                                              | 2.1                | 1.2 to 3.0    |
| 1369737_at                 | NM_017334               | CAMP responsive element modulator; Cren                        | 2.1                | -0.3 to 4.7   |
| 1387870_at                 | AB025017                | TIS11                                                          | 2.1                | 0.8 to 3.4    |
| 1396849_at                 | AW534332                | Ser/Thr kinase 35; STK35                                       | 2.0                | 1.1 to 3.1    |
| 1387788_at                 | NM_021836               | Junb                                                           | 2.0                | 1.4 to 2.6    |
| 1380772_at                 | BE105726                | AT rich interactive domain 5A ; Arida; MRF1                    | 2.0                | 0.2 to 4.0    |

\*, more than one probe set identified for a given gene.

Genes highlighted in red are unique to Quis treatment.

**Table S2: Genes upregulated with DHPG treatment**

| <i>Affymetrix Probeset</i> | <i>Accession Number</i> | <i>Unigene Gene Name</i>                                       | <i>Fold Change</i> | <i>95% CI</i> |
|----------------------------|-------------------------|----------------------------------------------------------------|--------------------|---------------|
| 1387316_at                 | NM_030845               | Chemokine (C-X-C motif) ligand 1; Cxcl1                        | 13.3               | 8.7 to 17.9   |
| 1369191_at                 | NM_012589               | Interleukin 6; IL6                                             | 7.5                | -0.9 to 15.8  |
| 1378032_at                 | AI176265                | NFkappaB; IκBz                                                 | 3.8                | 1.4 to 6.5    |
| 1389402_at                 | AI178746                | Csrnp1                                                         | 3.7                | 2.2 to 5.3    |
| 1393728_at                 | AA964541                | Leukemia inhibitory factor; Lif                                | 3.2                | 2.6 to 3.8    |
| *1386995_at                | BI288701                | B-cell translocation gene 2; Btg2                              | 3.2                | 1.1 to 5.3    |
| 1382351_at                 | AI069972                | Ras-related GTPase; Kir/Gem                                    | 3.1                | 1.7 to 4.5    |
| *1387306_a_at              | NM_053633               | Early growth response 2; egr2                                  | 2.9                | 0.9 to 5.0    |
| *1398266_a_at              | D83508                  | Early growth response 2; egr2                                  | 2.8                | 1.9 to 3.8    |
| *1386994_at                | NM_017259               | B-cell translocation gene 2; Btg2                              | 2.6                | 0.6 to 4.7    |
| 1377340_at                 | AI179507                | Tissue factor pathway inhibitor 2; TFPI2                       | 2.5                | -0.9 to 6.4   |
| 1372389_at                 | BF420059                | immediate early response 2; Ier2                               | 2.5                | 1.3 to 3.8    |
| 1394451_at                 | AI236455                | Annexin A1                                                     | 2.5                | 0.5 to 4.7    |
| 1387260_at                 | NM_053713               | Kruppel-like factor 4; KLF4                                    | 2.5                | 1.3 to 3.8    |
| 1372025_at                 | BI296467                | Paternally expressed 3; PEG3/PW1                               | 2.4                | -0.9 to 6.2   |
| 1382138_at                 | BG380221                | Notch-regulated ankyrin repeat protein                         | 2.3                | 0.4 to 4.4    |
| 1387870_at                 | AB025017                | TIS11                                                          | 2.3                | 0.8 to 3.9    |
| 1379228_at                 | BF418531                | Fms-like tyrosine kinase ligand 3; Flt3l                       | 2.1                | -0.5 to 5.2   |
| *1368147_at                | BE110108                | Dual specificity phosphatase 1; Dusp1                          | 2.1                | 0.8 to 3.5    |
| 1387410_at                 | U72345                  | Nuclear receptor subfamily 4, group A, member 2; Nr4a2; Nurr1  | 2.1                | 0.5 to 3.8    |
| 1369217_at                 | NM_017352               | Nuclear receptor subfamily 4, group A, member 3; Nr4A3; Nor1   | 2.0                | 0.9 to 3.2    |
| 1380229_at                 | AW530004                | v-maf musculoaponeurotic fibrosarcoma oncogene homolog F; Maff | 2.0                | 1.0 to 3.1    |
| *1368146_at                | U02553                  | Dual specificity phosphatase 1; Dusp1                          | 2.0                | 1.6 to 2.4    |

\*, more than one probe set identified for a given gene.

Genes highlighted in blue are unique to DHPG treatment.

**Table S3: Gene-specific primers used for QRT-PCR**

| <i>Gene</i>   | <i>5' - 3' Forward Primer</i> | <i>5' - 3' Reverse Primer</i> |
|---------------|-------------------------------|-------------------------------|
| <i>Arc</i>    | TCCTGCAGATTGGTAAGTGC          | GTGCAACCCTTTCAGCTCTC          |
| <i>Atf3</i>   | TGCCAAGTGTGCGAAACAAGA         | CGGTGCAGGTTGAGCATGTA          |
| <i>Ccn1l</i>  | GGGCAGGTGTTGTTTCATC           | CATGGCAACAATCTCGAAAC          |
| <i>Crem</i>   | ATGAGGAGACTGACCTTGCC          | GGAGCTCGGATCTGGTAAGT          |
| <i>Dusp5</i>  | TTCACAAGAGAAGCTCGAAGG         | GCCACCCTGGTCATAAGC            |
| <i>Egr2</i>   | GGAGATGGCATGATCAACAT          | TTGCCCATGTAAGTGAAGGT          |
| <i>Gapdh</i>  | TGCCCCCATGTTTGTGATG           | TGTGGTCATGAGCCCTTCC           |
| <i>Junb</i>   | CAGTTACTCCCCAGCCTCTG          | GCATGTGGGAGGTAGCTGAT          |
| <i>Nr4a1</i>  | AGGAGACCAAGACCTGTTGC          | CTCACCGGGCTTAGATCG            |
| <i>Nr4a2</i>  | TATTCCAGGTTCCAGGCAAA          | CCTCTGATGATCTCCATAGA          |
| <i>Snf1lk</i> | GGTTATGGAGACAAAAGACATGC       | CAAGTGCCCGTTGGAAGT            |
| <i>Trib1</i>  | GACCTGAAGCTTAGGAAATTCCG       | ATCTCAGGGCTCACATAGGC          |

Gene-specific primers for quantitative RT-PCR were designed using Primer3 v.0.4.0 software (20) according to Applied Biosystems guidelines. The primers were designed such that they cross exon-exon junction or lie on two exons to ensure specificity for RNA. For intronless genes, no-RT controls were kept and difference of 7  $C_T$  between +RT and -RT was considered to account for < 1% contribution by DNA to signal (Applied Biosystems).

### Supplemental Figure S1

**A**

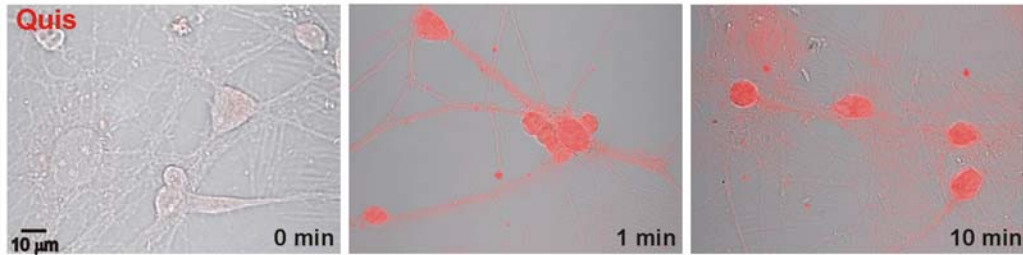

**B**

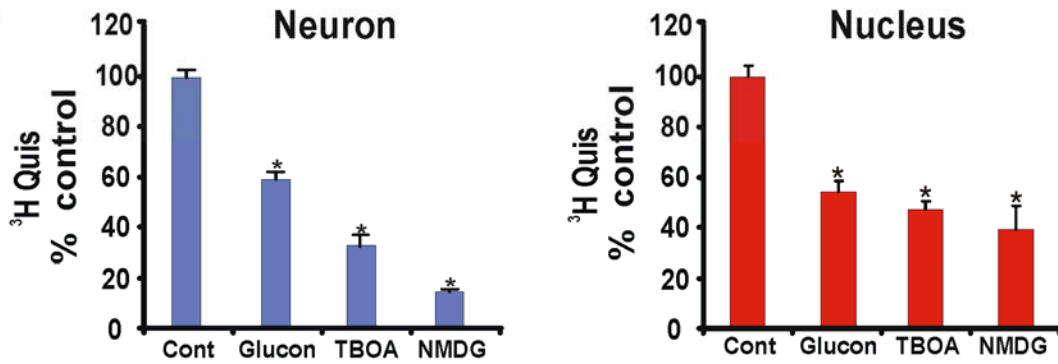

**C**

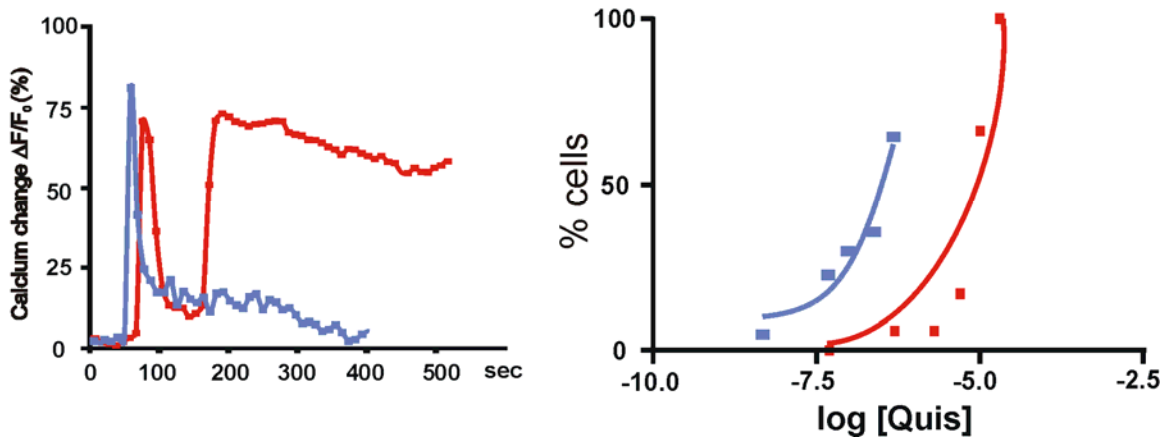

**Supplemental Figure S1. Quis is transported in striatal neurons and nuclei.** *A*, Demonstration of Quis uptake using anti-Quis antibody. *B*, Quis uptake using chloride free conditions (gluconate buffer) or in presence of EAAT3 inhibitor TBOA, or in sodium and chloride free ringier solution (NMDG). *C*, Quis dose-dependency in  $\text{Ca}^{2+}$  responses; only single transient peak (*blue*) observed at Quis doses  $< 250$  nM whereas both transient and sustained peaks (*red*) are seen with higher Quis concentrations ( $> 5$   $\mu\text{M}$ ).

Supplemental Figure S2

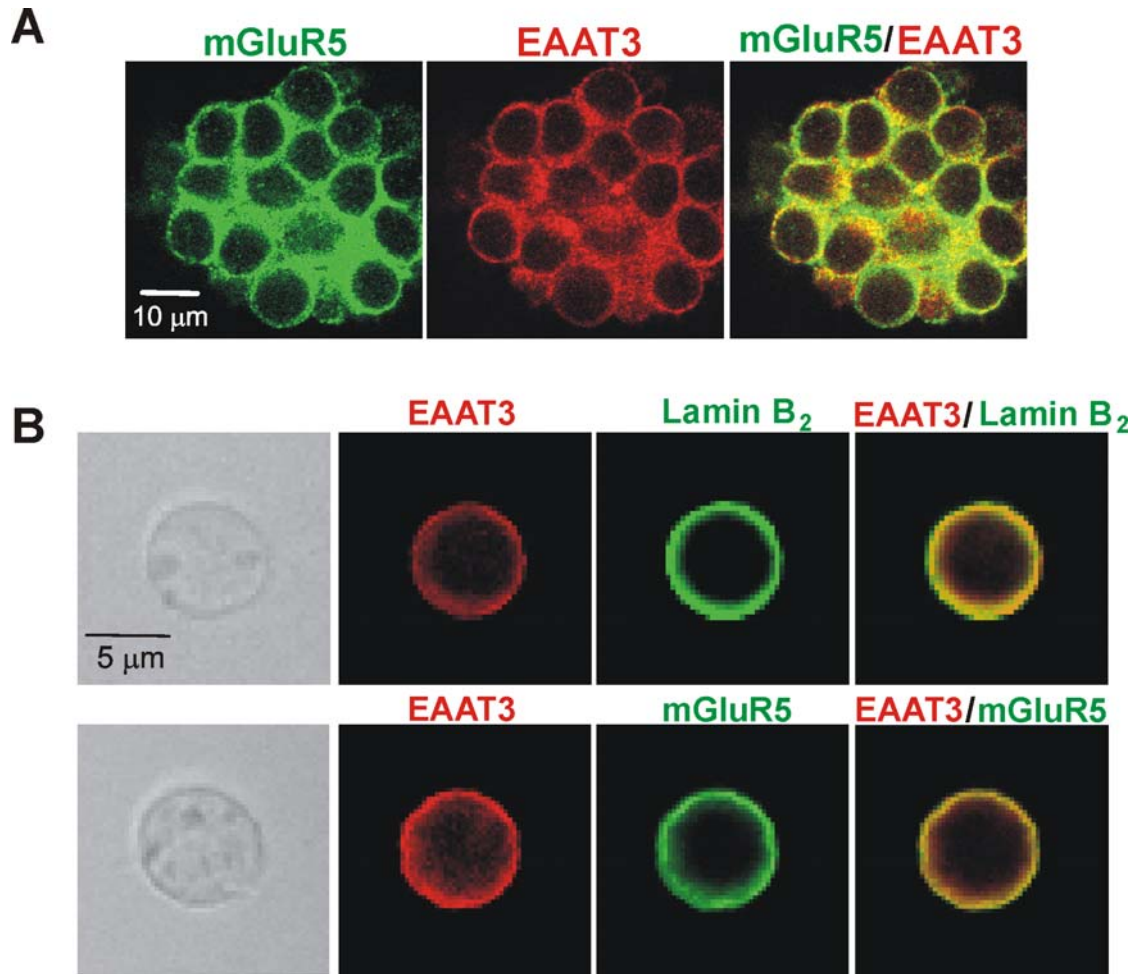

**Supplemental Figure S2.** EAAT3 (*red*) is expressed in mGluR5-positive striatal (*A*) and nuclei (*B*) where it co-localizes with mGluR5 (*green*) and Lamin B<sub>2</sub> (*green*).

### Supplemental Figure S3

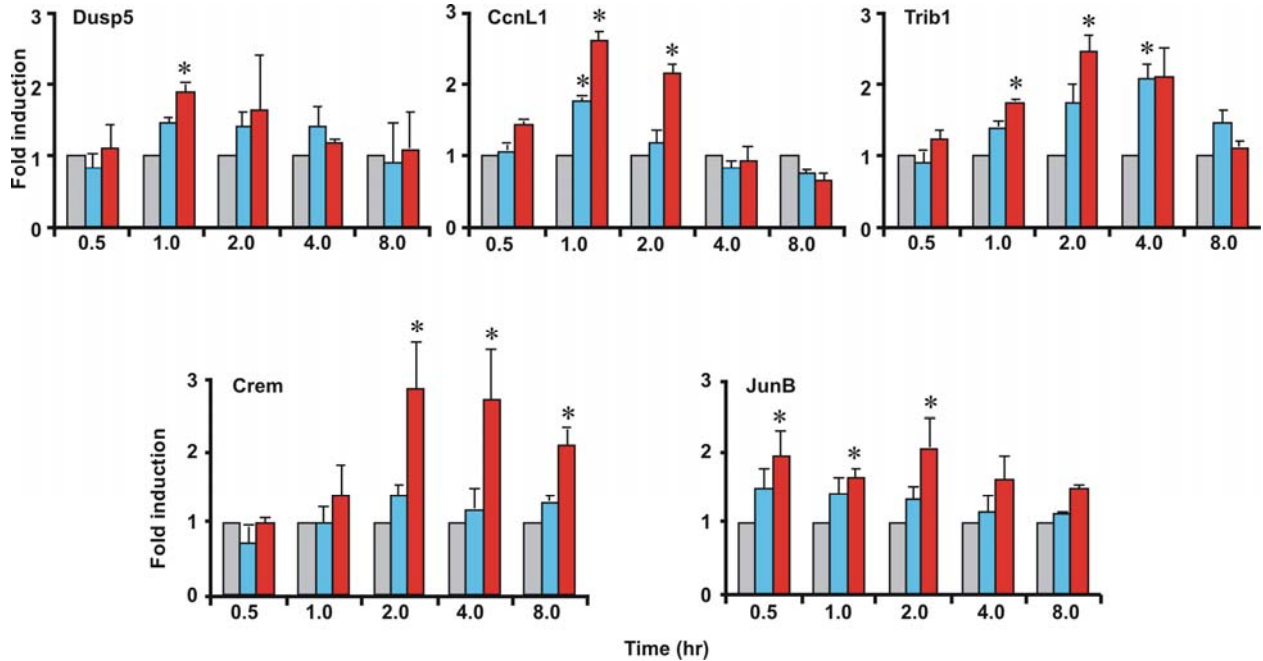

**Supplemental Figure S3. Quantitative RT-PCR validates microarray data.** Dissociated striatal neurons were treated with either Quis (*red*) or DHPG (*blue*) for indicated time points. Total RNA was isolated and subjected to quantitative RT-PCR using SYBR Green and gene-specific primers. Bars represent fold change (mean  $\pm$  S.E.M.) compared to the control (*gray*) from three independent experiments; \*,  $p < 0.05$  versus control.

Supplemental Figure S4

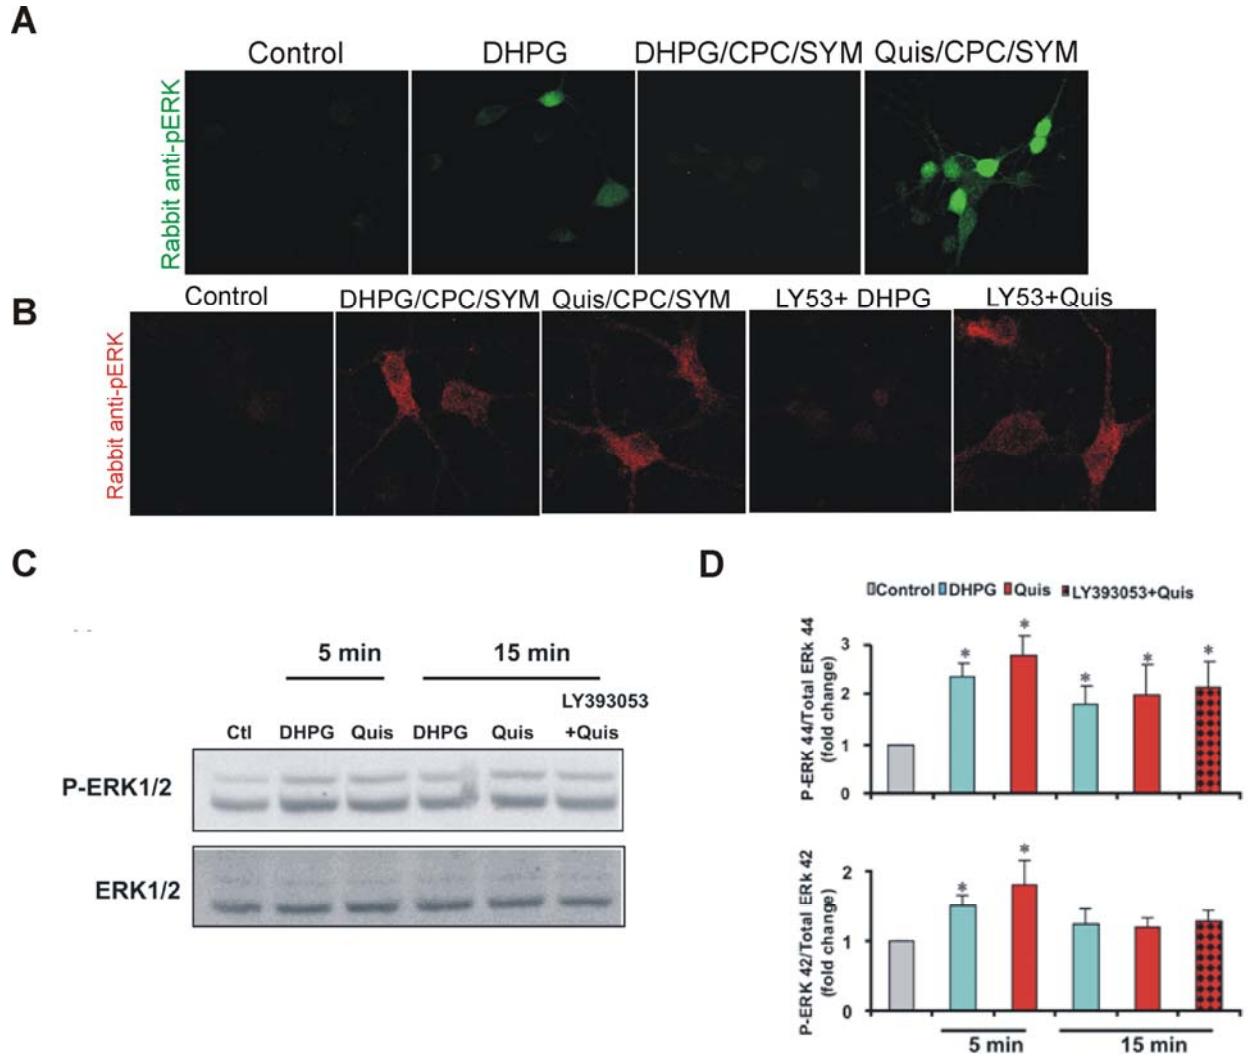

**Supplemental Figure S4. DHPG and Quis treatment lead to ERK1/2 phosphorylation in dissociated striatal and hippocampal cultures.** *A*, Striatal neurons were untreated (control, panel 1), treated with DHPG alone (panel 2) or pre-treated with 25  $\mu$ M SYM2206 and 20  $\mu$ M CPCCOEt and then treated with DHPG (panel 3) or Quis (panel 4) and stained for phospho ERK1/2 using rabbit anti-phospho ERK1/2 antibody. *B*, DIV 14 dissociated hippocampal neurons were pre-treated with SYM2206 and CPCCOEt and then treated with indicated drugs. Neurons were fixed and stained for phospho ERK1/2 using rabbit anti-phospho ERK1/2 antibody. *C*, Western blot analysis of hippocampal lysates treated with agonists for indicated times. *D*, Quantitation of blots from three separate experiments  $\pm$  S.E.; \*,  $p < 0.05$  versus control levels.
